# Supplementary material for: Reversible induction of mitophagy by an optogenetic bimodular system
Source: PubMed Central journal article supplement (PMC6449392; doi:10.1038/s41467-019-09487-1), 2019-04-04
Supplement: 41467_2019_9487_MOESM7_ESM.pdf [file 41467_2019_9487_MOESM7_ESM.pdf]

## Reporting Summary

Nature Research wishes to improve the reproducibility of the work that we publish. This form provides structure for consistency and transparency in reporting. For further information on Nature Research policies, see [Authors & Referees](#) and the [Editorial Policy Checklist](#).

### Statistics

For all statistical analyses, confirm that the following items are present in the figure legend, table legend, main text, or Methods section.

n/a Confirmed

- The exact sample size ( $n$ ) for each experimental group/condition, given as a discrete number and unit of measurement
- A statement on whether measurements were taken from distinct samples or whether the same sample was measured repeatedly
- The statistical test(s) used AND whether they are one- or two-sided  
*Only common tests should be described solely by name; describe more complex techniques in the Methods section.*
- A description of all covariates tested
- A description of any assumptions or corrections, such as tests of normality and adjustment for multiple comparisons
- A full description of the statistical parameters including central tendency (e.g. means) or other basic estimates (e.g. regression coefficient) AND variation (e.g. standard deviation) or associated estimates of uncertainty (e.g. confidence intervals)
- For null hypothesis testing, the test statistic (e.g.  $F$ ,  $t$ ,  $r$ ) with confidence intervals, effect sizes, degrees of freedom and  $P$  value noted  
*Give  $P$  values as exact values whenever suitable.*
- For Bayesian analysis, information on the choice of priors and Markov chain Monte Carlo settings
- For hierarchical and complex designs, identification of the appropriate level for tests and full reporting of outcomes
- Estimates of effect sizes (e.g. Cohen's  $d$ , Pearson's  $r$ ), indicating how they were calculated

*Our web collection on [statistics for biologists](#) contains articles on many of the points above.*

### Software and code

Policy information about [availability of computer code](#)

Data collection

No codes used in this study

Data analysis

No codes used in this study

For manuscripts utilizing custom algorithms or software that are central to the research but not yet described in published literature, software must be made available to editors/reviewers. We strongly encourage code deposition in a community repository (e.g. GitHub). See the Nature Research [guidelines for submitting code & software](#) for further information.

### Data

Policy information about [availability of data](#)

All manuscripts must include a [data availability statement](#). This statement should provide the following information, where applicable:

- Accession codes, unique identifiers, or web links for publicly available datasets
- A list of figures that have associated raw data
- A description of any restrictions on data availability

The authors declare that all data supporting the findings of this study are available within the paper and its supplementary information files. No datasets were generated in this study. The source data underlying Figs 1b-d, 2b-c, 3a-b, 4a-b, 5b-c, 6b-c and Supplementary Figures 1, 3, 5, 7, 8b, 9, 10, 14, 17 are provided as a Source Data file

## Field-specific reporting

Please select the one below that is the best fit for your research. If you are not sure, read the appropriate sections before making your selection.

Life sciences       Behavioural & social sciences       Ecological, evolutionary & environmental sciences

For a reference copy of the document with all sections, see [nature.com/documents/nr-reporting-summary-flat.pdf](https://www.nature.com/documents/nr-reporting-summary-flat.pdf)

## Life sciences study design

All studies must disclose on these points even when the disclosure is negative.

|                 |                                                                                                                                        |
|-----------------|----------------------------------------------------------------------------------------------------------------------------------------|
| Sample size     | No statistical methods were used to predetermine sample size.                                                                          |
| Data exclusions | No data were excluded from analysis.                                                                                                   |
| Replication     | All experiments have been performed at least three times independently. All attempts at replication were successful.                   |
| Randomization   | Allocation was random in all experiments.                                                                                              |
| Blinding        | Immunofluorescence images were acquired by a blind observer. Western blot and flow cytometry data did not required any blind operator. |

## Reporting for specific materials, systems and methods

We require information from authors about some types of materials, experimental systems and methods used in many studies. Here, indicate whether each material, system or method listed is relevant to your study. If you are not sure if a list item applies to your research, read the appropriate section before selecting a response.

### Materials & experimental systems

### Methods

| n/a                                 | Involved in the study                                           |
|-------------------------------------|-----------------------------------------------------------------|
| <input type="checkbox"/>            | <input checked="" type="checkbox"/> Antibodies                  |
| <input type="checkbox"/>            | <input checked="" type="checkbox"/> Eukaryotic cell lines       |
| <input checked="" type="checkbox"/> | <input type="checkbox"/> Palaeontology                          |
| <input type="checkbox"/>            | <input checked="" type="checkbox"/> Animals and other organisms |
| <input type="checkbox"/>            | <input checked="" type="checkbox"/> Human research participants |
| <input checked="" type="checkbox"/> | <input type="checkbox"/> Clinical data                          |

| n/a                                 | Involved in the study                              |
|-------------------------------------|----------------------------------------------------|
| <input checked="" type="checkbox"/> | <input type="checkbox"/> ChIP-seq                  |
| <input type="checkbox"/>            | <input checked="" type="checkbox"/> Flow cytometry |
| <input checked="" type="checkbox"/> | <input type="checkbox"/> MRI-based neuroimaging    |

## Antibodies

Antibodies used

Rabbit  $\alpha$ -Actin (Cell Signalling, 4967)  
 Mouse  $\alpha$ -AMBRA1 (Santa Cruz Biotechnology, sc-398204)  
 Rabbit  $\alpha$ -Casp3 (Cell Signalling, 9662)  
 Mouse  $\alpha$ -GAPDH (Chemicon International, now MerckMillipore Mab374)  
 Rabbit  $\alpha$ -HSP60 (Santa Cruz Biotechnology, sc-13966)  
 Rabbit  $\alpha$ -PARP (Cell Signalling, 9542)  
 Rabbit  $\alpha$ -SOD2 (Enzo LifeScience, ADI-SOD-110)  
 Mouse  $\alpha$ -Tom20 (Santa Cruz Biotechnology, sc-17764)  
 Mouse  $\alpha$ -Tubulin (Sigma-Aldrich, T6199)  
 rabbit  $\alpha$ -Tom20 (Santa Cruz Biotechnology, sc-11415)  
 anti-CD3 (OKT3, eBioscience, 14-0037-82)  
 anti-CD28 (BD Biosciences, 555726)  
 rabbit a-HUWE1 (Bethyl, A300-486A)

Validation

All antibodies are validated by manufacturers. In addition, all mitochondrial antibodies have been validated by us through colocalization with the mitochondrial reporter Venus-iLID-ActA and/or biochemically through mitochondria/cytosol purification (see Fig. 1b). HUWE1 antibody was also validated by us through siRNA (see Supplementary Figure 14). Finally, PARP and casp3 antibodies were validated in our experiments by the appearance of a cleaved PARP/casp3 band when apoptosis was induced (see Fig. 6c and Supplementary Figure 17).

## Eukaryotic cell lines

Policy information about [cell lines](#)

|                                                                   |                                                                                                                                                                                                                                                                                                                                                                                                                                                                                                                  |
|-------------------------------------------------------------------|------------------------------------------------------------------------------------------------------------------------------------------------------------------------------------------------------------------------------------------------------------------------------------------------------------------------------------------------------------------------------------------------------------------------------------------------------------------------------------------------------------------|
| Cell line source(s)                                               | HeLa, HEK293T, ETNA, 293T/17                                                                                                                                                                                                                                                                                                                                                                                                                                                                                     |
| Authentication                                                    | HeLa (catalogue number 93021013) and HEK cells (ECACC 12022001) have been purchased from Sigma. ETNA cells have been immortalized in our laboratory from embryonic striatum primordia murine E14.5 neurons, as described in Cozzolino et al., 2004 (included in the reference list). The 293T/17 packaging cell line (ATCC® CRL-11268) was authenticated by short tandem repeat analysis by an external certified company (Eurofins Genomics). All cell lines were routinely tested for mycoplasma contamination |
| Mycoplasma contamination                                          | All cell lines tested negative for mycoplasma contamination                                                                                                                                                                                                                                                                                                                                                                                                                                                      |
| Commonly misidentified lines (See <a href="#">ICLAC</a> register) | None                                                                                                                                                                                                                                                                                                                                                                                                                                                                                                             |

## Animals and other organisms

Policy information about [studies involving animals](#); [ARRIVE guidelines](#) recommended for reporting animal research

|                         |                                                                                                                                                                                                                                                                                                                                                                                              |
|-------------------------|----------------------------------------------------------------------------------------------------------------------------------------------------------------------------------------------------------------------------------------------------------------------------------------------------------------------------------------------------------------------------------------------|
| Laboratory animals      | Zebrafish ( <i>D. rerio</i> ) of wild type strain were maintained at 28.5°C in a Tecniplast aquarium system. Embryos were obtained by natural breeding and raised in Petri dishes containing Fish Water solution at 28.5°C with a photoperiod of 14 h light/10 h dark. Developmental stages of embryos were determined according to the time after fertilization and morphological criteria. |
| Wild animals            | This study did not involve wild animals                                                                                                                                                                                                                                                                                                                                                      |
| Field-collected samples | This study did not involve samples collected from the field                                                                                                                                                                                                                                                                                                                                  |
| Ethics oversight        | All husbandry and experimental procedures complied with European Legislation for the Protection of Animals used for Scientific Purposes (Directive 2010/63/EU). EU does not require specific approval for experimental procedures done with zebrafish embryos.                                                                                                                               |

Note that full information on the approval of the study protocol must also be provided in the manuscript.

## Human research participants

Policy information about [studies involving human research participants](#)

|                            |                                                                                                                                                                                                                                                                                                                                                               |
|----------------------------|---------------------------------------------------------------------------------------------------------------------------------------------------------------------------------------------------------------------------------------------------------------------------------------------------------------------------------------------------------------|
| Population characteristics | Peripheral blood mononuclear cells (PBMC) were isolated from buffy coats obtained from adult volunteers (healthy donors) from Bambino Gesù Children's Hospital (OPBG) in Rome, Italy, who signed a written informed consent, in accordance with rules set by the Institutional Review Board of OPBG (Approval of Ethical Committee N°969/2015 prot. N° 669LB) |
| Recruitment                | Human adult blood donor volunteers                                                                                                                                                                                                                                                                                                                            |
| Ethics oversight           | Bambino Gesù Children Hospital                                                                                                                                                                                                                                                                                                                                |

Note that full information on the approval of the study protocol must also be provided in the manuscript.

## Flow Cytometry

### Plots

Confirm that:

- The axis labels state the marker and fluorochrome used (e.g. CD4-FITC).
- The axis scales are clearly visible. Include numbers along axes only for bottom left plot of group (a 'group' is an analysis of identical markers).
- All plots are contour plots with outliers or pseudocolor plots.
- A numerical value for number of cells or percentage (with statistics) is provided.

### Methodology

|                    |                                                                                                                                                                                                                                                                                                                                                                                                                                                                                                                                                                                                                                                                                                                                                                                                                                                                                                                                                                                                                               |
|--------------------|-------------------------------------------------------------------------------------------------------------------------------------------------------------------------------------------------------------------------------------------------------------------------------------------------------------------------------------------------------------------------------------------------------------------------------------------------------------------------------------------------------------------------------------------------------------------------------------------------------------------------------------------------------------------------------------------------------------------------------------------------------------------------------------------------------------------------------------------------------------------------------------------------------------------------------------------------------------------------------------------------------------------------------|
| Sample preparation | HeLa cells have been trypsinized and harvested, washed twice with PBS and incubated for 15min with AnnexinV-FITC antibody (AnnexinV Apoptosis Detection Kit) then washed and read. For pulse-chase experiments, HeLa cells have been fixed and stained with Cell Reaction Buffer Kit (Invitrogen) using Alkyne-Alexa647 conjugation with pre-incubated AHA reagent (Invitrogen). Peripheral blood mononuclear cells (PBMC) were isolated from buffy coats, using Lymphocytes separation medium (Eurobio, France). T lymphocytes were activated with immobilized OKT3 (1 µg/ml, e-Bioscience, California, USA) and anti-CD28 (1 µg/ml, BD Biosciences, Europe) monoclonal antibodies in the presence of recombinant human interleukin-7 (IL7, 10 ng/ml; R&D, USA) and 15 (IL15, 5 ng/ml; R&D)41. Activated T cells were transduced on day 3 in 24-well plates pre-coated with recombinant human RetroNectin (Takara-Bio, Japan) using a specific retroviral supernatant. On day 5 after transduction, T cells were expanded in |
|--------------------|-------------------------------------------------------------------------------------------------------------------------------------------------------------------------------------------------------------------------------------------------------------------------------------------------------------------------------------------------------------------------------------------------------------------------------------------------------------------------------------------------------------------------------------------------------------------------------------------------------------------------------------------------------------------------------------------------------------------------------------------------------------------------------------------------------------------------------------------------------------------------------------------------------------------------------------------------------------------------------------------------------------------------------|

medium containing 45% RPMI1640 and 45% Click's medium (Sigma-Aldrich) supplemented with 10% FBS and 2 mM Glutamax and replenished twice a week. Expression of the CD3 cell surface molecule, the green and red fluorescence proteins were determined by flow-cytometry using standard methodology. For each sample, we analyzed a minimum of 20,000 events.

Instrument

Accuri C6; FACS Celesta; BD LSRFortessa X-20

Software

FACSDiva; Accuri C6 software

Cell population abundance

No sorting procedures used.

Gating strategy

AnnexinV: HeLa cells identified with FSC/SSC

Pulse-chase and viability analysis: HeLa cells identified with FSC/SSC have been further subdivided into non transfected YFP-negative cells and transfected YFP-positive cells (on which Alexa-647 median fluorescence intensity was measured).

Human T cells: identified with FSC/SSC. Then cells have been analysed for green (Venus-YFP) and red (Ambra-RFP) fluorescences.

A detailed Supplementary Figure (supplementary figure 18) has been provided showing gating strategy

Tick this box to confirm that a figure exemplifying the gating strategy is provided in the Supplementary Information.
